# Supplementary material for: Lactoferrin-mediated macrophage targeting delivery and patchouli alcohol-based therapeutic strategy for inflammatory bowel diseases
Source: PubMed Central journal article supplement — Acta Pharm Sin B. 2020 Aug 5;10(10):1966–76. doi: 10.1016/j.apsb.2020.07.019 (PMC7606100; doi:10.1016/j.apsb.2020.07.019), 2020-08-05
Supplement: mmc1.pdf [file mmc1.pdf]

## Supporting Information for

### ORIGINAL ARTICLE

# Lactoferrin-mediated macrophage targeting delivery and patchouli alcohol-based therapeutic strategy for inflammatory bowel diseases

Yuge Zhao<sup>a,b,c</sup>, Yuting Yang<sup>a,b</sup>, Jiaxin Zhang<sup>a,d</sup>, Rong Wang<sup>a,b</sup>, Biyun Cheng<sup>a,c</sup>, Dipika Kalambe<sup>a,c</sup>, Yingshu Wang<sup>a,d</sup>, Zeyun Gu<sup>a,c</sup>, Dongying Chen<sup>a,e,\*</sup>, Bing Wang<sup>a,\*</sup>, Yongzhuo Huang<sup>a,c,f,g,\*</sup>

<sup>a</sup>State Key Laboratory of Drug Research, Shanghai Institute of Materia Medica, Chinese Academy of Sciences, Shanghai 201203, China

<sup>b</sup>Nanchang University College of Pharmacy, Nanchang 330006, China

<sup>c</sup>University of Chinese Academy of Sciences, Beijing 100049, China

<sup>d</sup>Shanghai University of Traditional Chinese Medicine, Shanghai 201203, China

<sup>e</sup>Laboratory of Pharmaceutical Analysis, Shanghai Institute of Materia Medica, Chinese Academy of Sciences, Shanghai 201203, China

<sup>f</sup>NMPA Key Laboratory for Quality Research and Evaluation of Pharmaceutical Excipients, Shanghai 201203, China

<sup>g</sup>Zhongshan Branch, the Institute of Drug Research and Development, Chinese Academy of Sciences, Zhongshan 528437, China

Running title: Macrophage-targeting delivery of patchouli alcohol for IBD treatment

\*Corresponding authors. Tel.: +86 21 20231981 (Yongzhuo Huang); Tel.: +86 21 20231000 ext 1403 (Bing Wang); Tel.: +86 21 50806053 (Dongying Chen).

E-mail addresses: yzhuang@simm.ac.cn (Yongzhuo Huang), bwang@simm.ac.cn (Bing Wang), dychen@simm.ac.cn (Dongying Chen).

**Table S1** Characterization of the liposomes (mean±SD,  $n = 3$ ).

| Category | PDI       | DE (%)   | DL (%)  |
|----------|-----------|----------|---------|
| Lipo     | 0.19±0.02 | 74.8±1.4 | 4.7±0.1 |
| LF-lipo  | 0.20±0.02 | 64.2±1.8 | 3.8±0.1 |

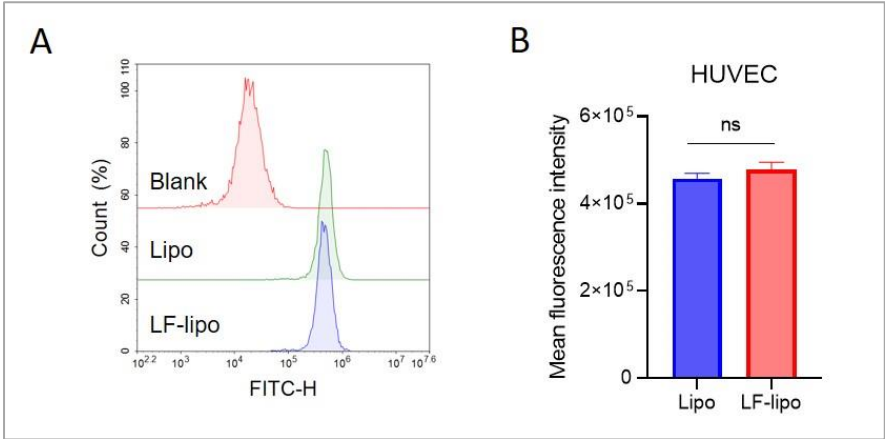

**Figure S1** The uptake of Lipo and LF-lipo in HUVEC cells that poorly expressed LRP-1 (mean  $\pm$ SD,  $n=3$ ; ns, no significance).

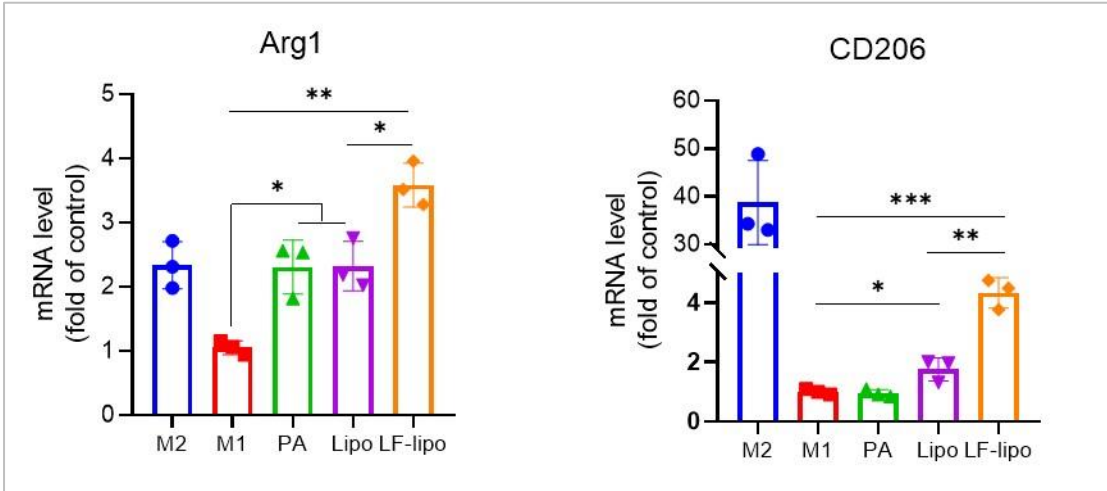

**Figure S2** The mRNA levels of Arg1 and CD206 in M1  $\Phi$  after treatment (mean  $\pm$ SD,  $n = 3$ , \*  $P < 0.05$ , \*\*  $P < 0.01$ , \*\*\*  $P < 0.001$ ).

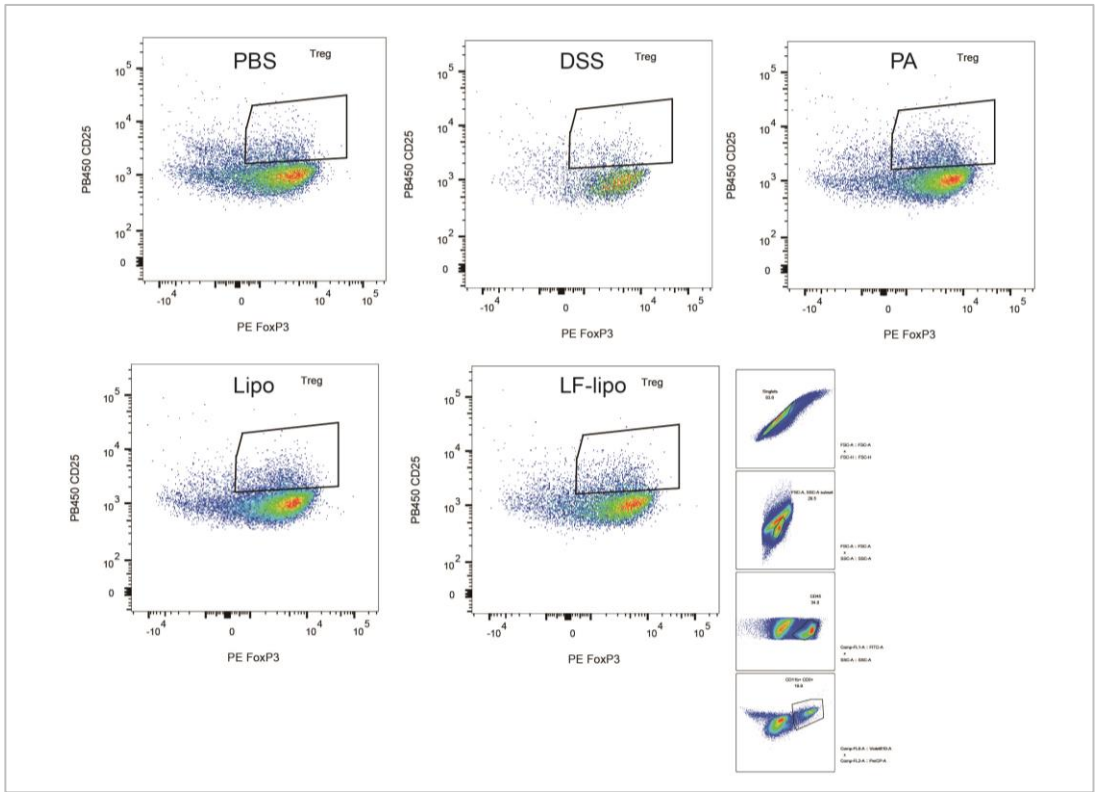

**Figure S3** Flow cytometric assay results of Treg cells in the inflamed colon tissues after treatment.

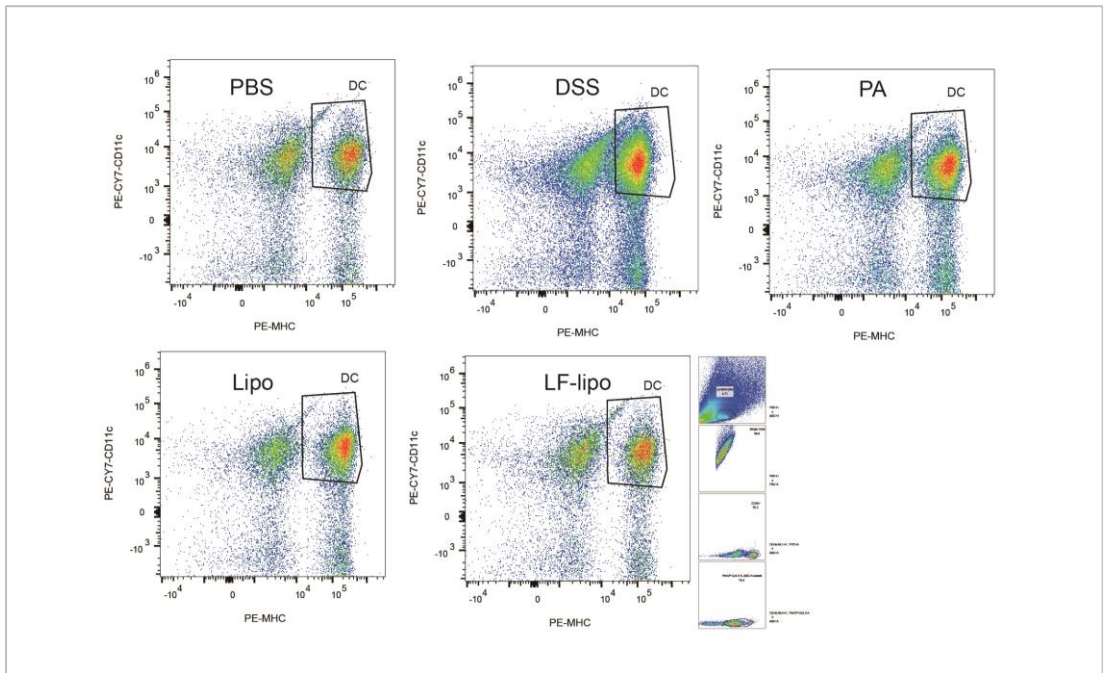

**Figure S4** Flow cytometry results of dendritic cells (DCs) in the inflamed colon tissues after treatment.

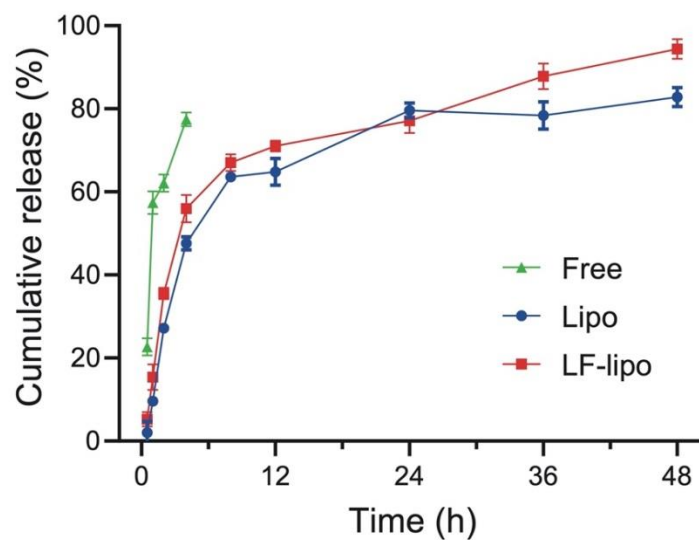

**Figure S5** *In-vitro* drug release results in a medium containing 20% ethanol. The drug release was fast at a release medium containing a high concentration of ethanol that could cause the destruction of liposomes (mean  $\pm$ SD,  $n = 3$ ).
